# Supplementary material
Source: publisher figshare collection journal article supplement (https://acs.figshare.com/ndownloader/files/4112305)
Supplement: Supplementary file 1 [file 4112305]

## 1. Get the wfn files

### ➤ With a Gaussian03 output file from an IRC calculation

- Read the output file (irc.out): read\_irc irc.out
- Input: start number:
  - 0 to read the whole path
  - 1/-1 to read only from the reactant to the transition state/ transition state to the production (respectively)
  - TS number: structure number associated with the transition state
  - E min: minimum energy on the path

Two files are then obtained:

**geom.\_ $\alpha$ .inp** ( $\alpha$  = tot, rev or fwd depending on the “start\_number” selected); this is a Gaussian input containing the geometries of the different IRC structures and the Gaussian commands to obtain the wfn files for each point.

**irc.\_ $\alpha$ .dat** ( $\alpha$  = tot, rev or fwd depending on the “start\_number” selected); dat file (can be read with gnuplot) containing the relative energy for each point of the path.

- Submit geom.\_XXX.inp

The geom\_XXX.wfn files (XXX = point number, XXX starts with 001) are obtained in output.

### ➤ With a Gaussian09 output file from a dynamic calculation

- Read the output file from BOMD dynamic (dyna.out): read\_dyna dyna.out
- Input the number of points of the dynamic (npts)

The file geom\_tot.inp is obtained: Gaussian input file that contains the geometries of the points of the dynamic and the Gaussian commands to obtain the wfn files for each point.

- Submit geom\_tot.inp

The geom.\_XXX.wfn files are obtained in output

## 2. Get the NCI files

- Launch make\_scan\_nci.sh : the files geomXXX-dens.cube, geomXXX-grad.cube and geomXXX.dat are obtained in output.
- Launch scan\_topo.sh: the files geomXXX.wfn\_topo.xyz (NCI Interaction Critical Points), geomXXX.wfn\_topo.dat are obtained in output.

## 3. Get the ELF files

- Launch xyz.sh: the files \*.sbf and geomXXX\_elf.cube, geomXXX\_esyn.cube and geomXXX\_ebas.xyz are obtained in output.
- Launch make\_scan\_elf.sh: the files geom.XXX.wfn\_pop.out, geomXXX.wfn\_sumelf.out are obtained in output.

ATTENTION: the different files used to launch the calculations can be modified in order to change the type of calculation done.

| Program          | Associated Input file                                                              |
|------------------|------------------------------------------------------------------------------------|
| make_scan_nci.sh | nci.inp                                                                            |
| scan_topo.sh     | topo.inp                                                                           |
| xyz.sh           | grid.inp<br>elf.inp<br>rho.inp<br>ebas_sbf.inp<br>esbf.inp<br>ysbf.inp<br>exyz.inp |
| make_scan_elf.sh | grid.inp<br>elf.inp<br>rho.inp<br>pop.inp                                          |

#### 4. Get the animations

- Open one structure with vmd, choose the view point desired and save the state.
- Launch elf\_nci\_visualization.pl: “./elf\_nci\_visualization.pl input output\_vmd\_surface output\_vmd\_attractor”
- An example of input file is proposed in example-input-vmd-file. You must input
  - The number of the first and last geometry (starting from 1)
  - The type of picture you want (ELF, NCI or BOTH)
  - The vmd representation (CPK, licorice or line)
  - The ELF isosurface cutoff (if input=0, then default 0.8 value is used)
  - The NCI isosurface cutoff, color scale range (default 0.2, -5.0, 5.0)

Note: If BOTH keyword is specified then ELF comes before NCI)

- View point from the vmd previously saved

*This will create the vmd files: output\_vmd\_surface output\_vmd\_attractor files*

##### a. Obtaining a film and pictures of the evolution of the surfaces

- Open vmd and load output\_vmd\_surface state: *tga format pictures are obtained for every point.*
- Launch tga2gifanim: *a gif animation named aro\_anim.gif and gif pictures for every previous tga file are obtained*

##### b. Obtaining a film and pictures of the evolution of ELF attractors and NCI ICPs

- Open vmd and load output\_vmd\_attractor *tga format pictures are obtained for every point.*
- Launch tga2gifanim: *a gif animation named aro\_anim.gif and gif pictures for every previous tga file are obtained*

##### c. Obtaining a film and pictures of the evolution of the 2D NCI graph

- Launch gnup.sh: *png files for each geomXXX.dat file are obtained*
- Launch png2gifanim: *a gif animation named aro\_anim.gif and gif pictures for every previous png file are obtained*
